# Supplementary material
Source: PubMed Central journal article supplement (PMC2148287)

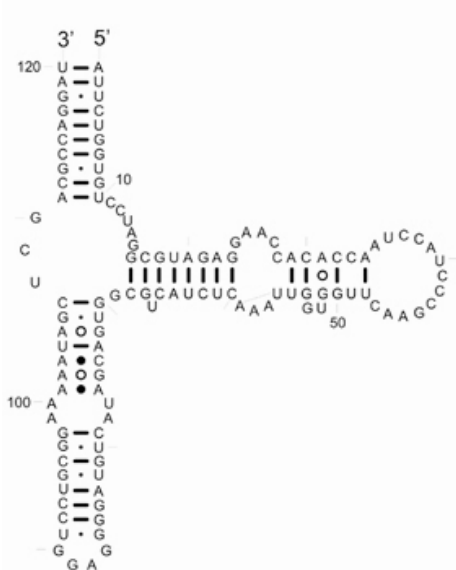

*Spinacea oleracea*  
 (SpoICr109; SpoICr110)

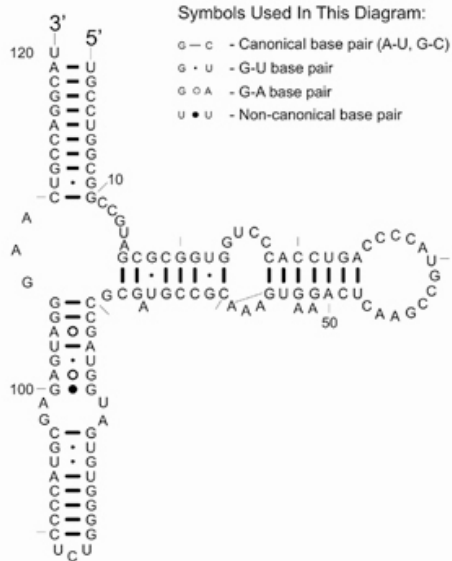

*Escherichia coli*  
 (V00336)

Supplement: pnas_0709856104_3.pdf [file pnas_0709856104_3.pdf]
